# Supplementary material for: Synthesis of copper(ii) complex-functionalized Fe3O4@ISNA (ISNA = isonicotinic acid) as a magnetically recoverable nanomaterial: catalytic studies in alcohol oxidation and nitrophenol reduction, and TD-DFT studies
Source: Royal Society of Chemistry journal article supplement (doi:10.1039/d3nj05440c), 2024-01-01
Supplement: d3nj05440c1.pdf [file d3nj05440c1.pdf]

## Supporting Information

**Synthesis of Copper(II) Complex-functionalized Fe<sub>3</sub>O<sub>4</sub>@ISNA (ISNA=Isonicotinic acid) as magnetically recoverable nanomaterials: Catalytic studies on Alcohol oxidation, Nitrophenol reduction and TD-DFT studies.**

Rimpa Mondal<sup>a</sup>, Aratrika Chakraborty<sup>b</sup>, Ennio Zangrando<sup>c</sup>, Madhulata Shukla<sup>d</sup>, \* and Tanmay Chattopadhyay<sup>a, \*</sup>

<sup>a</sup> *Department of Chemistry, Diamond Harbour Women's University, Diamond Harbour Road, Sarisha, South 24 Pgs, 743368*

<sup>b</sup> *Department of Chemistry, Lady Brabourne College, P-1/2 Suhrawardy Avenue, Kolkata 700 017, India*

<sup>c</sup> *Department of Chemical and Pharmaceutical Sciences, University of Trieste, Trieste-34127, Italy*

<sup>d</sup> *Department of Chemistry, Gram Bharti College Ramgarh, Veer Kunwar Singh University, Kaimur-821110, India*

## INDEX

| Fig./Table      |                                                                                                                                                                                                                        | Page |
|-----------------|------------------------------------------------------------------------------------------------------------------------------------------------------------------------------------------------------------------------|------|
| <b>Fig. S1</b>  | FT-IR spectra of HL <sup>1</sup> . Left, highlighted region is magnified to show the peaks due to C=N frequency [1645 cm <sup>-1</sup> ]; Right, skeletal vibration of aromatic benzene ring [1541 cm <sup>-1</sup> ]  | 3    |
| <b>Fig. S2</b>  | FT-IR spectra of HL <sup>2</sup> . Left, highlighted region is magnified to show the peaks due to C=N frequency [1647 cm <sup>-1</sup> ]; Right, skeletal vibration of aromatic benzene ring [1540 cm <sup>-1</sup> ]. | 3    |
| <b>Fig. S3</b>  | (a) <sup>1</sup> H NMR of 4-chloro-2-(2pyridyl)ethylimino)methyl)phenol(HL <sup>1</sup> )<br>(b) <sup>13</sup> C NMR of 4-chloro-2-(2pyridyl)ethylimino)methyl)phenol(HL <sup>1</sup> ).                               | 4    |
| <b>Fig. S4</b>  | (a) <sup>1</sup> H NMR of 4-bromo-2-(2pyridyl)ethylimino)methyl)phenol(HL <sup>2</sup> )<br>(b) <sup>13</sup> C NMR of 4-bromo-2-(2pyridyl)ethylimino)methyl)phenol(HL <sup>2</sup> ).                                 | 5    |
| <b>Fig. S5</b>  | FT-IR Spectra of Complex <b>1</b> [CuL <sup>1</sup> Cl] <sub>2</sub>                                                                                                                                                   | 6    |
| <b>Fig. S6</b>  | FT-IR Spectra of Complex <b>2</b> [CuL <sup>2</sup> Cl] <sub>2</sub>                                                                                                                                                   | 6    |
| <b>Fig. S7</b>  | UV Visible spectra of the ligand and complex <b>1</b> [CuL <sup>1</sup> Cl] <sub>2</sub>                                                                                                                               | 7    |
| <b>Fig. S8</b>  | UV Visible spectra of the ligand and complex <b>2</b> [CuL <sup>2</sup> Cl] <sub>2</sub>                                                                                                                               | 7    |
| <b>Fig. S9</b>  | FT-IR spectra of (a) Fe <sub>3</sub> O <sub>4</sub> @ISNA (b) magnified portion highlighting FT-IR spectrum of Fe <sub>3</sub> O <sub>4</sub> @ISNA (c) Fe <sub>3</sub> O <sub>4</sub> @ISNA@CuL <sup>1</sup>          | 8-9  |
| <b>Fig. S10</b> | The Fobs vs Fcalc plot for complex <b>1</b> after suitably processed data                                                                                                                                              | 9    |
| <b>Fig. S11</b> | The Fobs vs Fcalc plot for complex <b>2</b> .                                                                                                                                                                          | 10   |
| <b>Fig. S12</b> | View of reciprocal lattice for complex <b>2</b> .                                                                                                                                                                      | 10   |
| <b>Fig. S13</b> | Few selected different vibrational modes/motions of high intensity for complex <b>2</b> .                                                                                                                              | 11   |
| <b>Fig. S14</b> | Correlation of calculated and experimental frequencies of complex <b>2</b> .                                                                                                                                           | 11   |
| <b>Table 1S</b> | Hydrogen bond parameters (Å /°) for complex <b>2</b> .                                                                                                                                                                 | 12   |
| <b>Table 2S</b> | Selected DFT calculated harmonic vibrational frequencies of complex <b>1</b> (a scaling factor of 0.96 was used above 2900 cm <sup>-1</sup> ) and of <b>2</b> and their band assignments.                              | 12   |
| <b>Table 3S</b> | The calculated absorption maxima, oscillator strength, and their corresponding band assignment for complex <b>1</b> .                                                                                                  | 13   |
| <b>Table 4S</b> | The calculated absorption maxima, oscillator strength, and their corresponding band assignment for complex <b>2</b> .                                                                                                  | 13   |

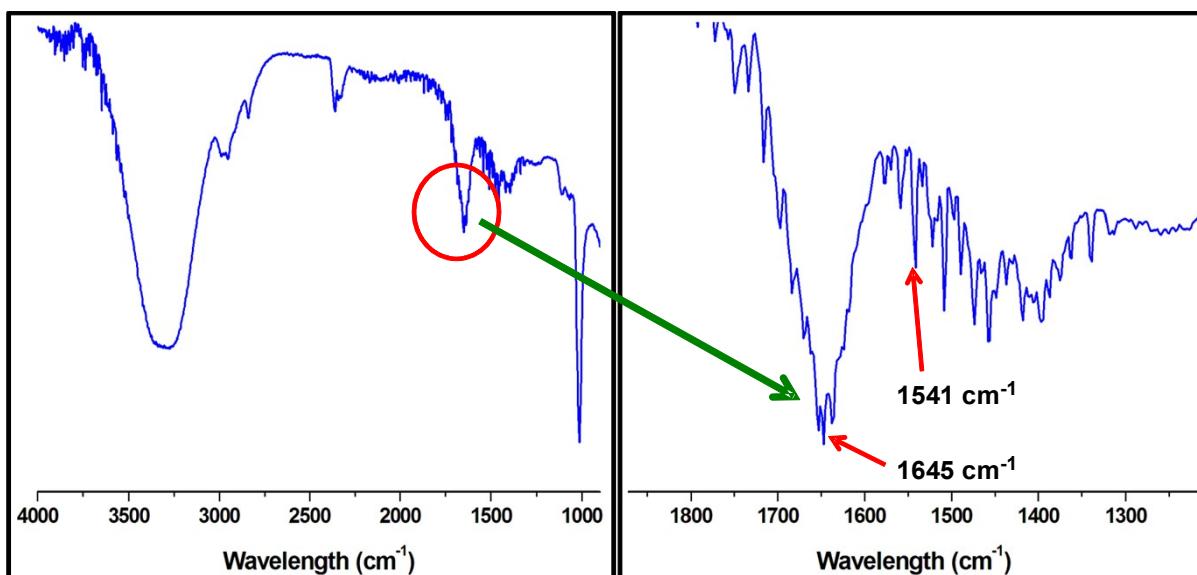

**Fig. S1.** FT-IR spectra of HL<sup>1</sup>. Left, highlighted region is magnified to show the peaks due to C=N frequency [1645 cm<sup>-1</sup>]; Right, skeletal vibration of aromatic benzene ring [1541 cm<sup>-1</sup>]

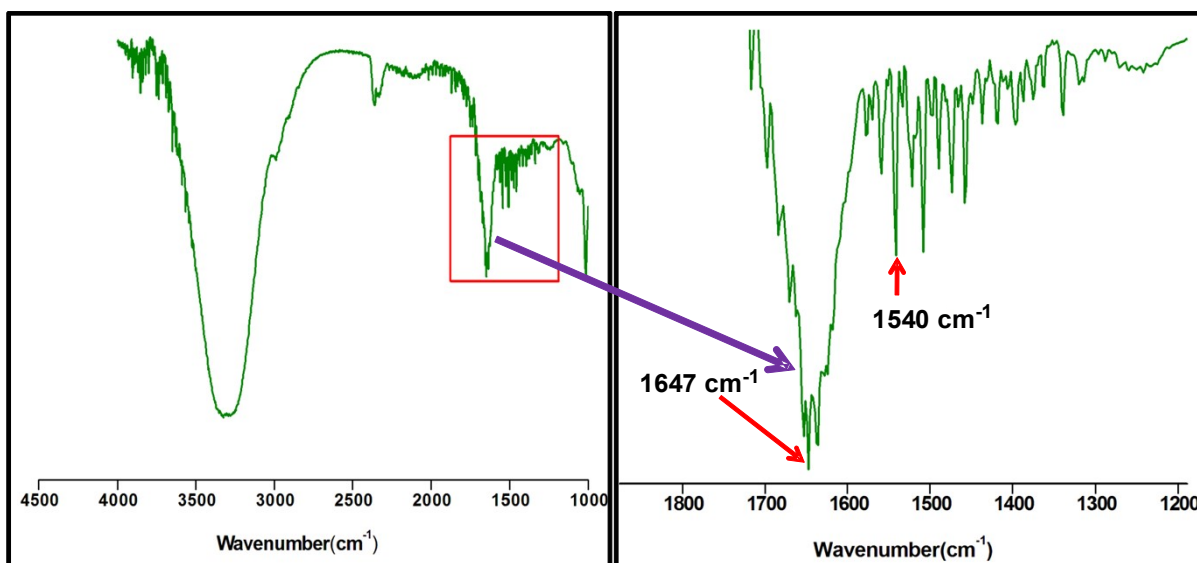

**Fig. S2.** FT-IR spectra of HL<sup>2</sup>. Left, highlighted region is magnified to show the peaks due to C=N frequency [1647 cm<sup>-1</sup>]; Right, skeletal vibration of aromatic benzene ring [1540 cm<sup>-1</sup>].

**4-chloro-2-(2-pyridyl)ethylimino)methyl)phenol (HL<sup>1</sup>)** : <sup>1</sup>H NMR (300 MHz, CDCl<sub>3</sub>) δ 13.37 (s, 1H), 8.54 (dt, J = 4.5, 1.5 Hz, 1H), 8.17 (s, 1H), 7.57 (td, J = 7.5, 1.8 Hz, 1H), 7.32 (dd, J = 9.0, 2.4 Hz, 1H), 7.29 – 7.22 (m, 1H), 7.12 (dd, J = 7.6, 4.8 Hz, 2H), 6.80 (d, J = 9.0 Hz, 1H), 4.01 (td, J = 6.9, 1.2 Hz, 2H), 3.15 (t, J = 6.9 Hz, 2H) ppm. <sup>13</sup>C NMR (75 MHz, CDCl<sub>3</sub>) δ 164.2, 160.4, 158.9, 149.6, 136.6, 134.93, 133.4, 123.8, 121.8, 120.1, 119.1, 110.0, 77.6, 77.1, 76.7, 59.0, 39.3 ppm.

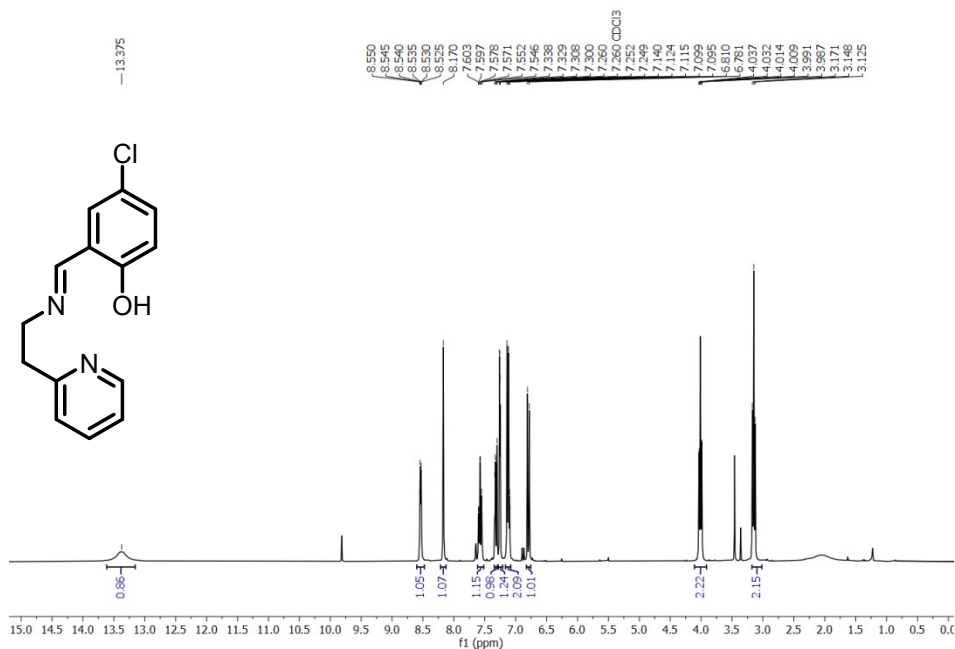

(a)

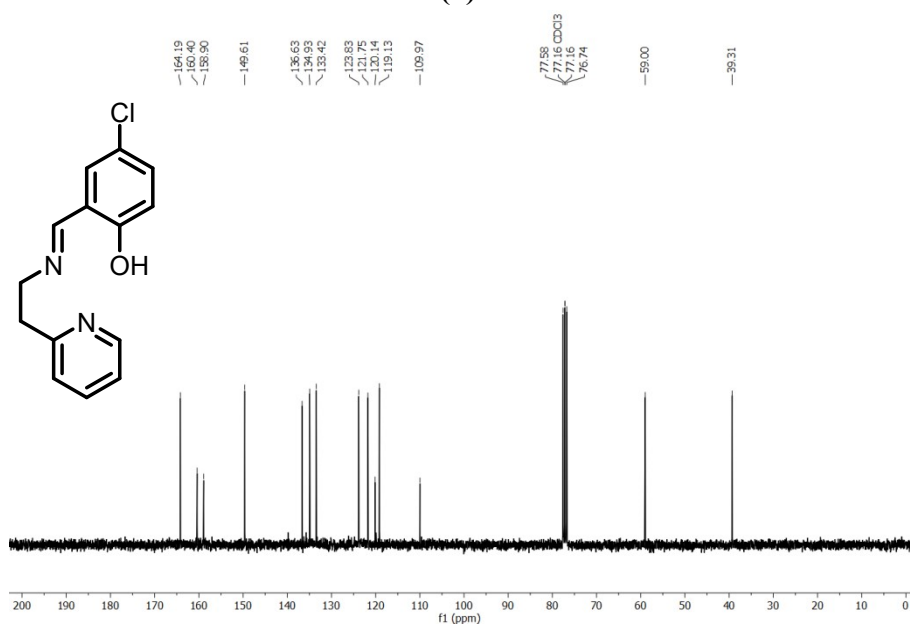

(b)

**Fig. S3.** (a) <sup>1</sup>H NMR of 4-chloro-2-(2-pyridyl)ethylimino)methyl)phenol(HL<sup>1</sup>)  
 (b) <sup>13</sup>C NMR of 4-chloro-2-(2-pyridyl)ethylimino)methyl)phenol(HL<sup>1</sup>)

**4-bromo-2-(2-pyridyl)ethylimino)methyl)phenol (HL<sub>2</sub>) :**

<sup>1</sup>H NMR (300 MHz, CDCl<sub>3</sub>) δ 13.34 (s, 1H), 8.56 – 8.53 (m, 1H), 8.18 (s, 1H), 7.61 – 7.55 (m, 1H), 7.20 (dd, J = 9.0, 2.7 Hz, 1H), 7.15 – 7.10 (m, 3H), 6.85 (d, J = 9.0 Hz, 1H), 4.06 – 3.98 (m, 2H), 3.16 (t, J = 6.9 Hz, 2H) ppm. <sup>13</sup>C NMR (75 MHz, CDCl<sub>3</sub>) δ 164.3, 159.9, 158.9, 149., 136.6, 132.1, 130.4, 123.8, 123.1, 121.7, 119.5, 118.7, 77., 77.2, 76.7, 59.0, 39.3 ppm.

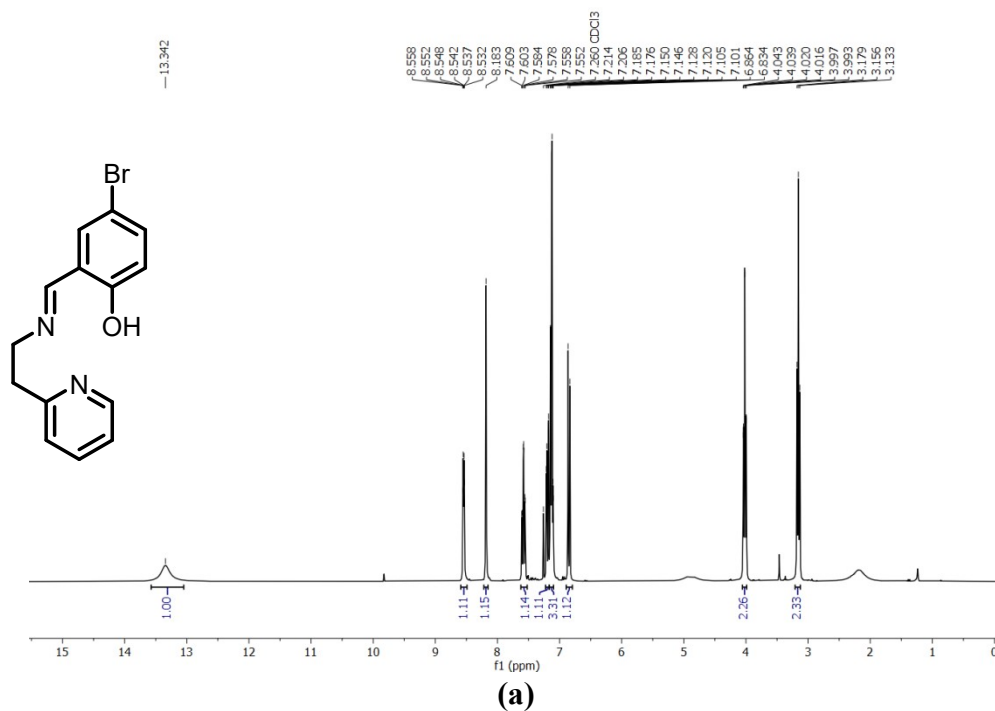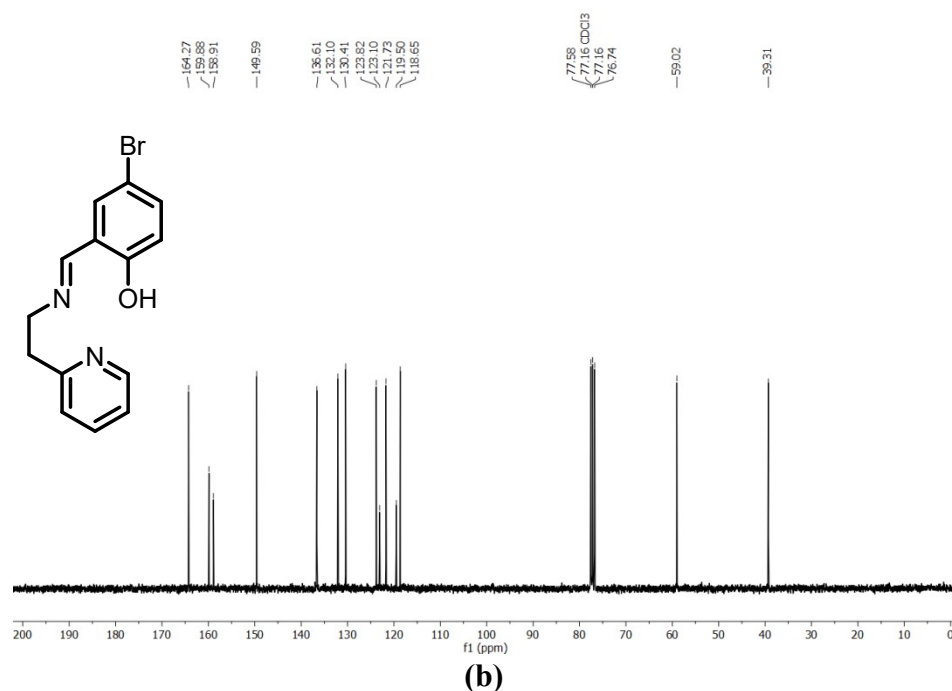

**Fig. S4.** (a) <sup>1</sup>H NMR of 4-bromo-2-(2-pyridyl)ethylimino)methyl)phenol(HL<sup>2</sup>)  
(b) <sup>13</sup>C NMR of 4-bromo-2-(2-pyridyl)ethylimino)methyl)phenol(HL<sup>2</sup>)

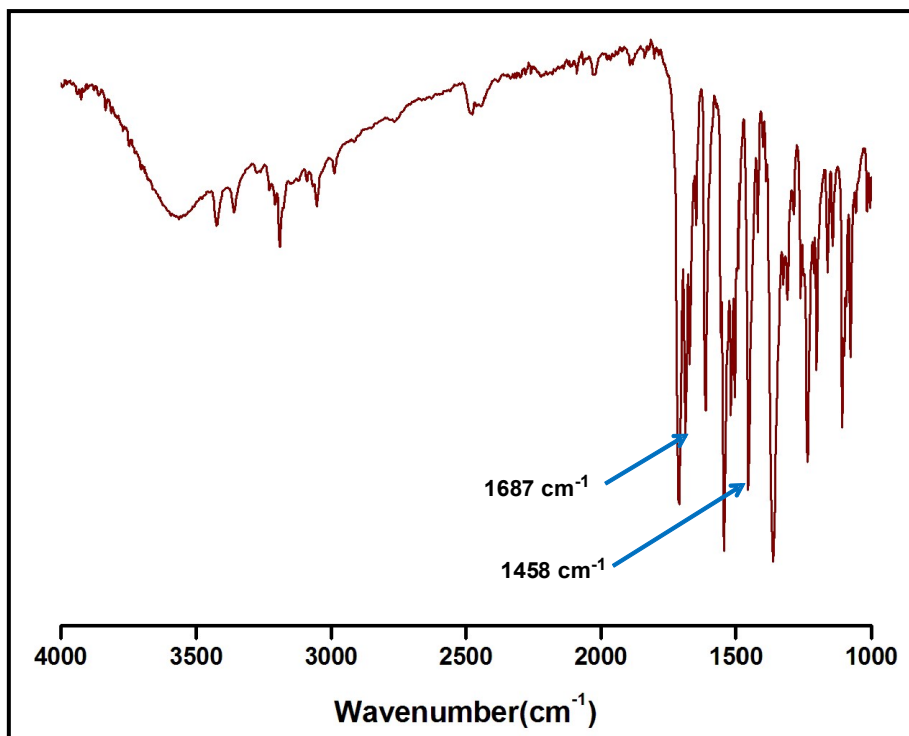

Fig. S5. FT-IR Spectrum of complex 1,  $[\text{CuL}^1\text{Cl}]_2$

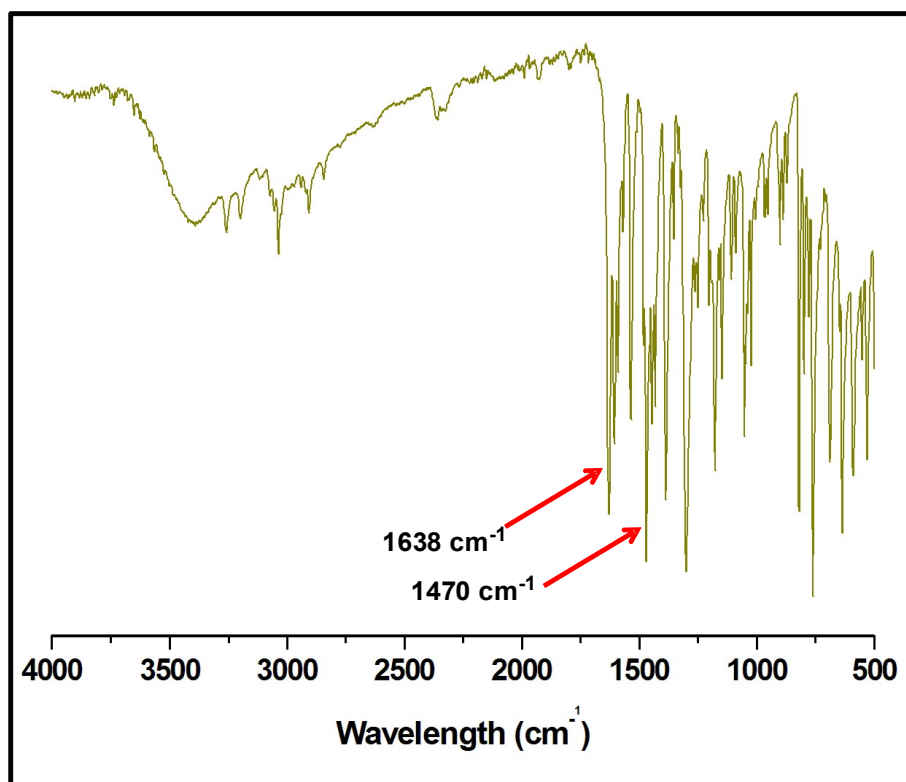

Fig. S6. FT-IR Spectrum of complex 2,  $[\text{CuL}^2\text{Cl}]_2$

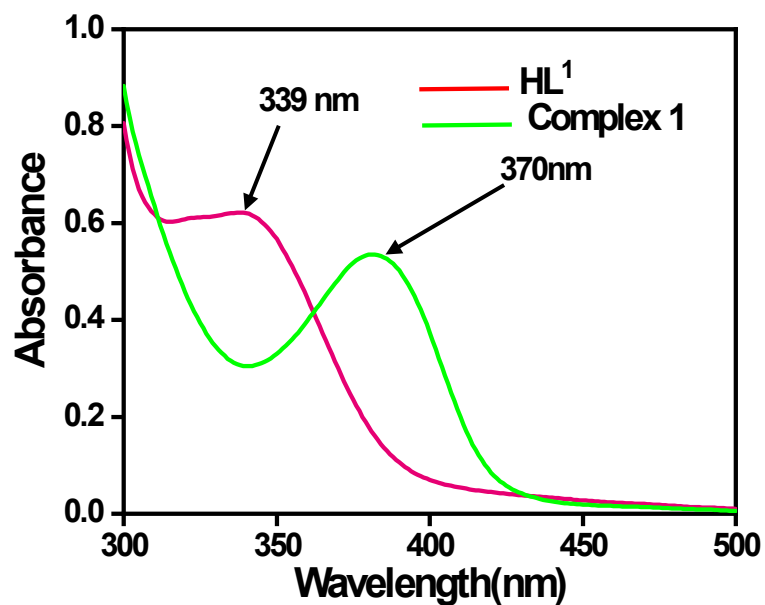

Fig. S7. UV Visible spectra of the ligand and complex 1, [CuL<sup>1</sup>Cl]<sub>2</sub>

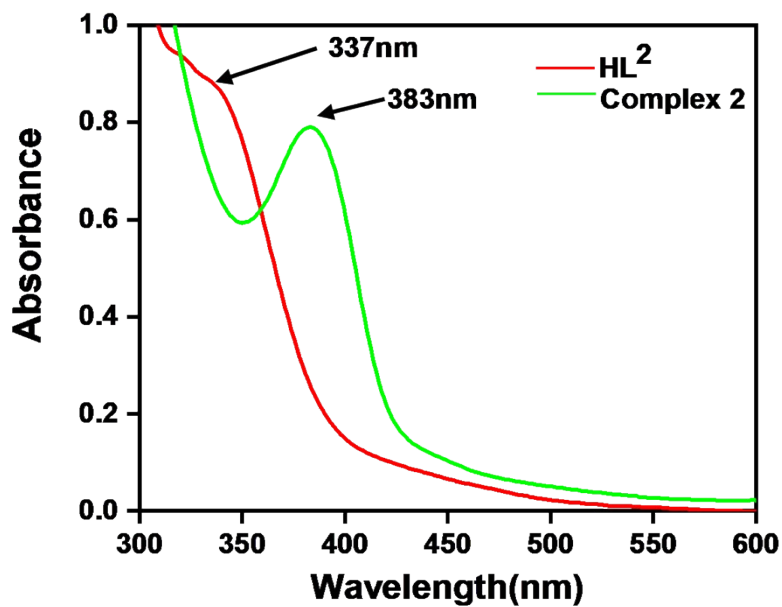

Fig. S8. UV Visible spectra of the ligand and complex 2, [CuL<sup>2</sup>Cl]<sub>2</sub>

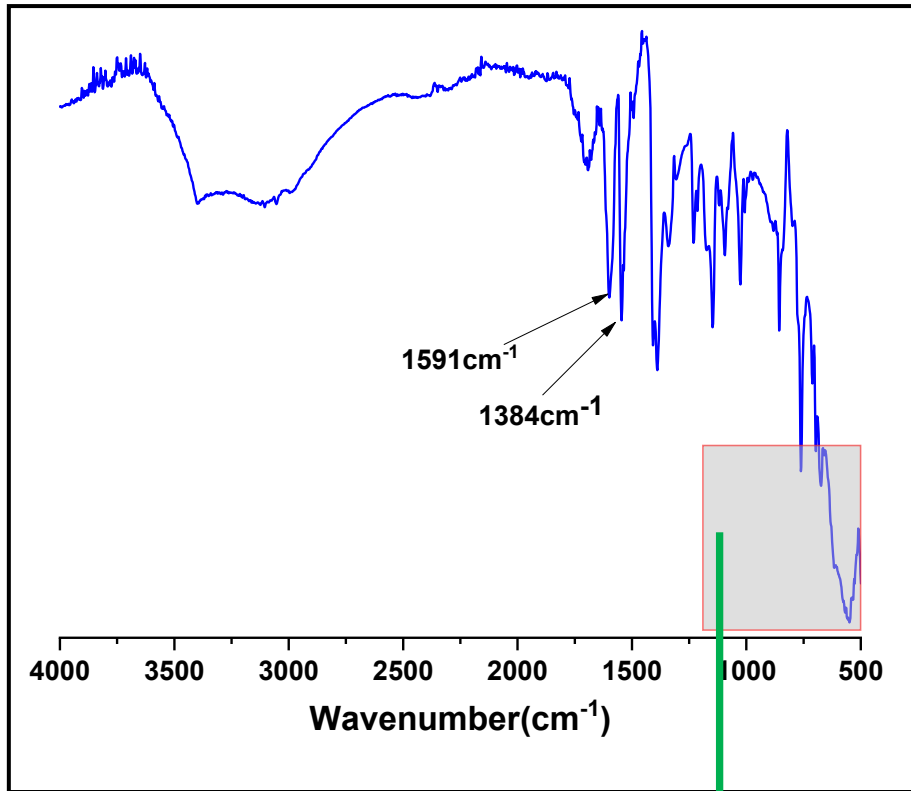

(a)

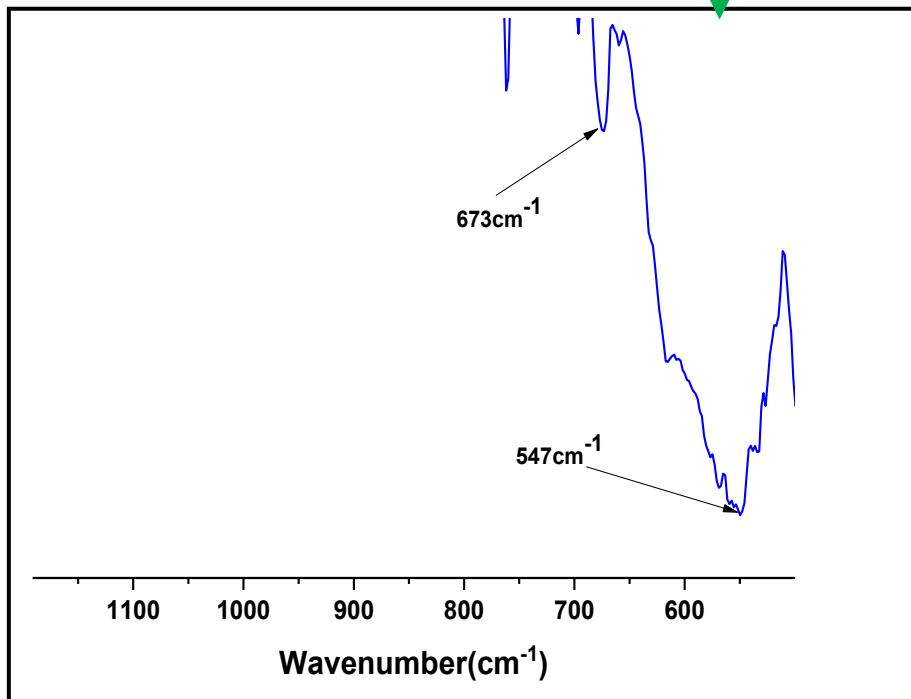

(b)



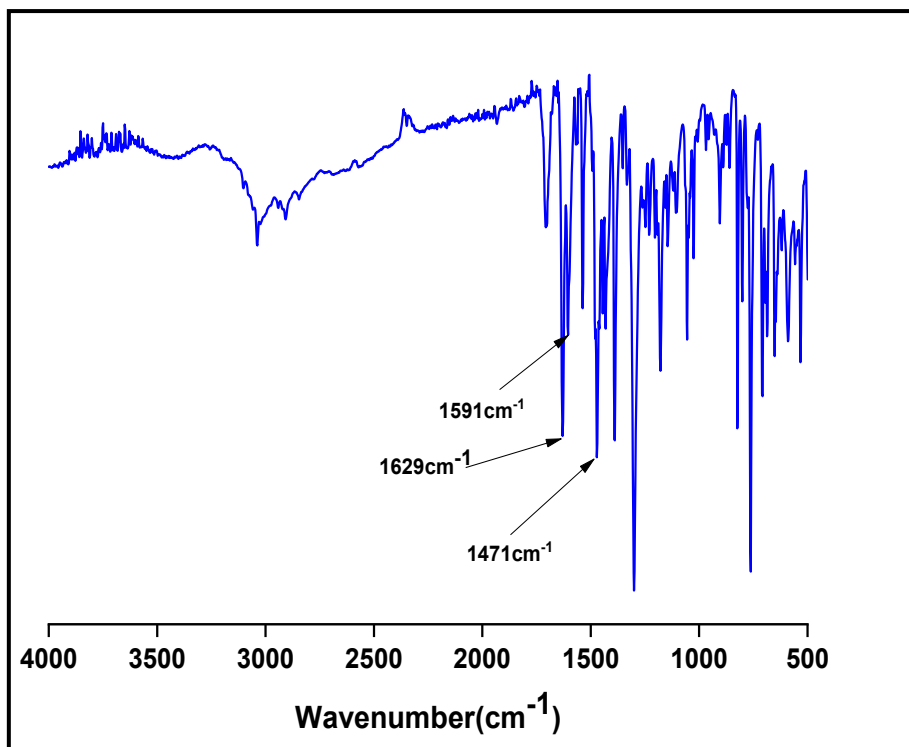

**Fig. S9.** FT-IR spectra of (a) Fe<sub>3</sub>O<sub>4</sub>@ISNA (b) magnified portion highlighting FT-IR spectrum of Fe<sub>3</sub>O<sub>4</sub>@ISNA (c) Fe<sub>3</sub>O<sub>4</sub>@ISNA@CuL<sup>1</sup>

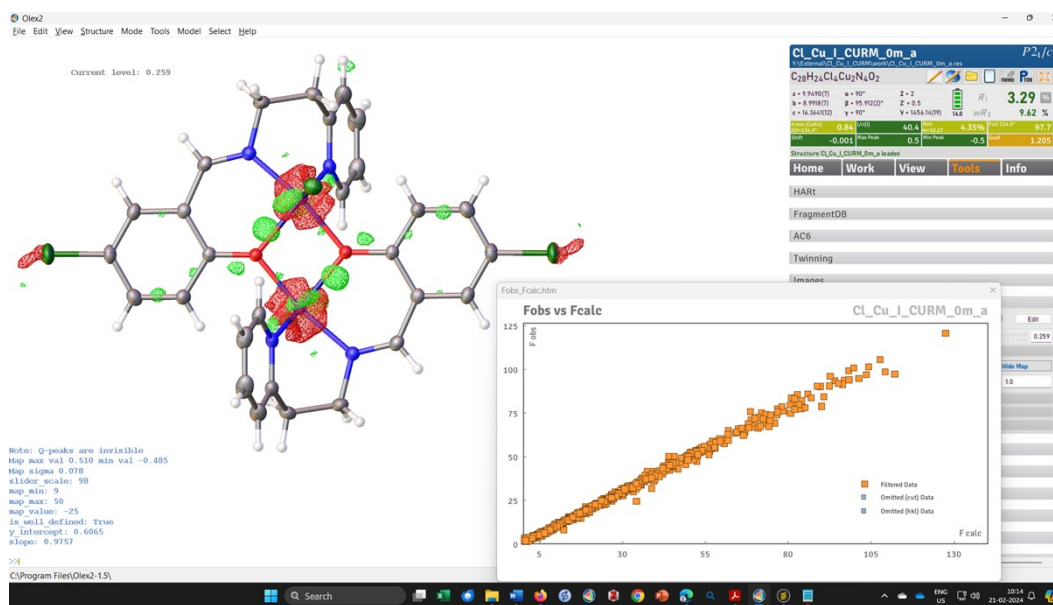

**Fig. S10.** The Fobs vs Fcalc plot for complex 1 after suitably processed data.

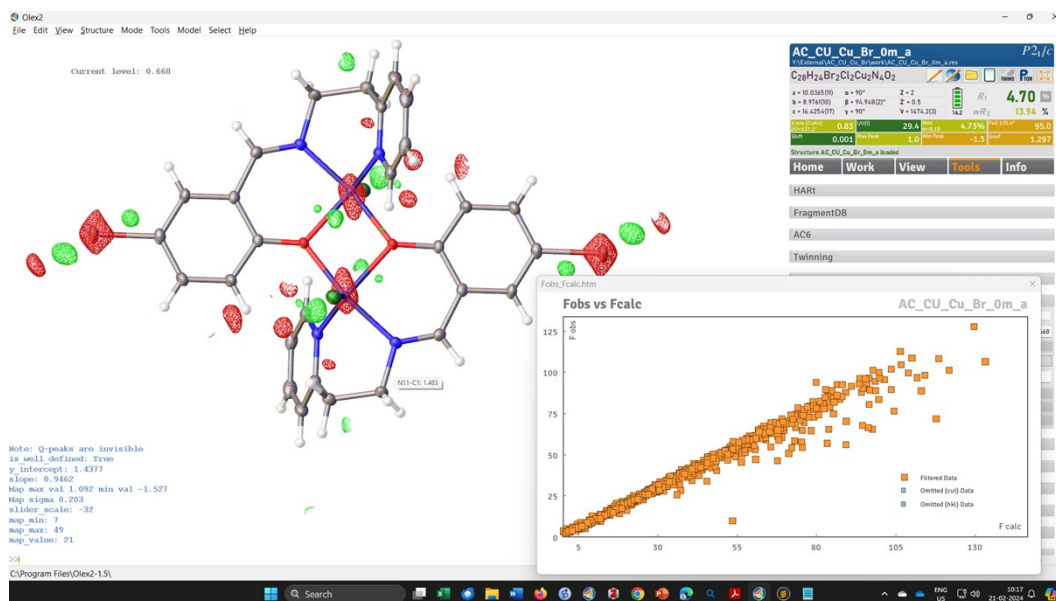

**Fig. S11.** The Fobs vs Fcalc plot for complex **2** which reflects the crystal quality and consequently the diffraction pattern. When the crystal was cut, some microcrystals were on the edges, so that their diffraction might have contributed to the present observations where noisy reflections were observed in all batches (Fig. S12). The completeness of 95% was obtained by following the standard data collection time and redundancy. No reflection was omitted, no significant twin fraction was detected and no mistake or misassignment is associated with the structure.

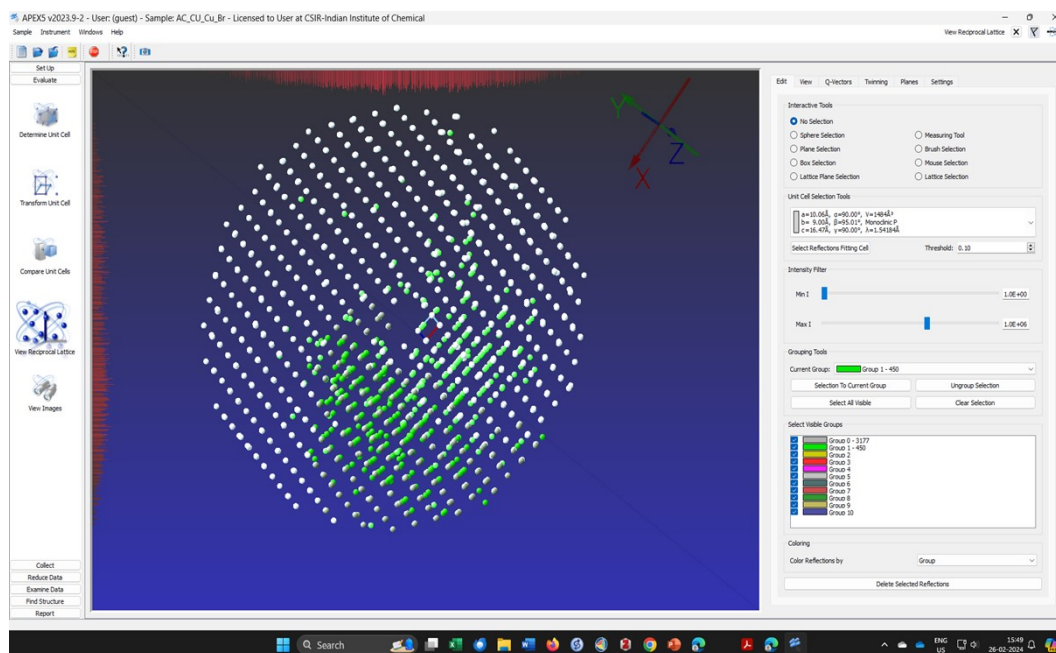

**Fig. S12.** View of reciprocal lattice for complex **2**. The green colour spots indicate reflections that do not fit into the major reflections and could not be indexed.

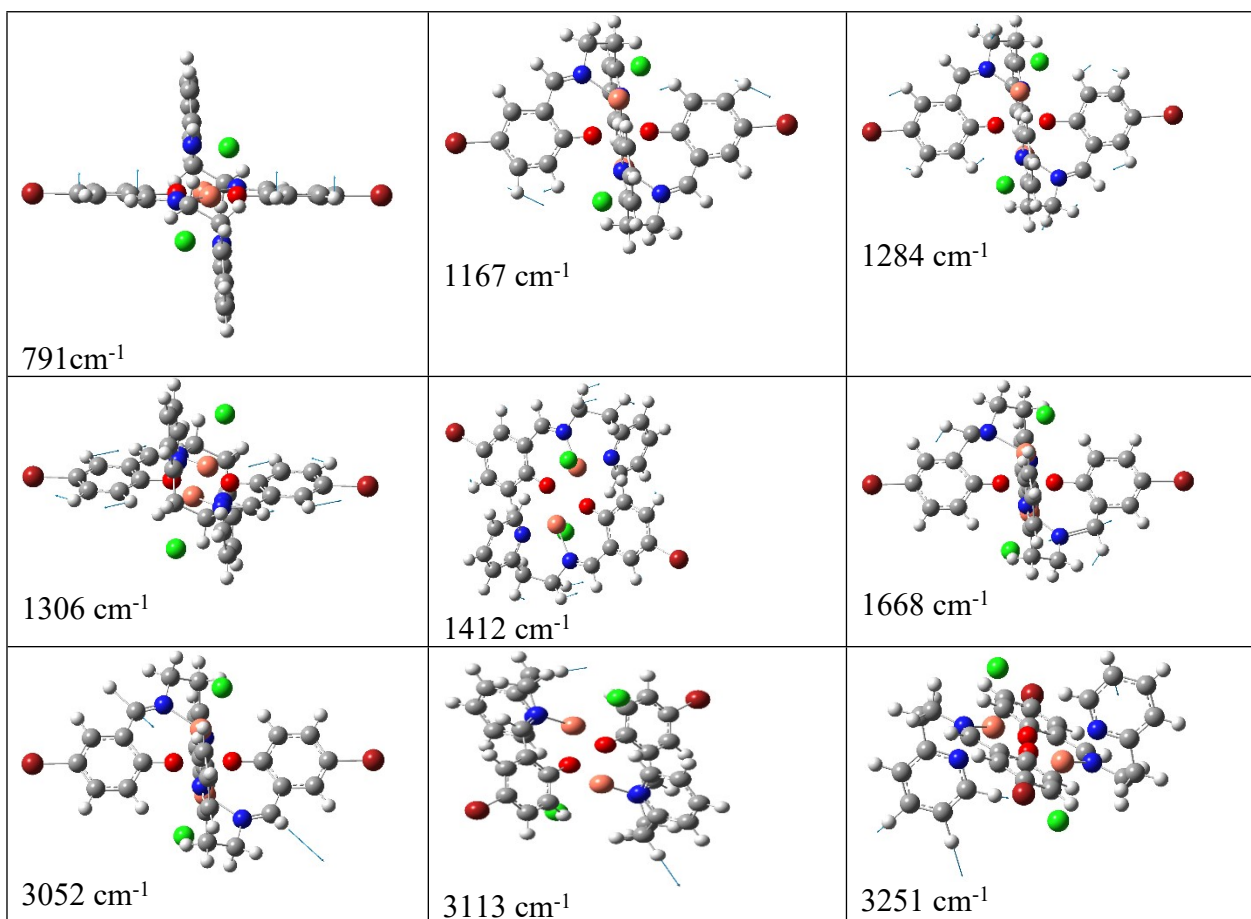

**Fig. S13:** Few selected different vibrational modes/motions of high intensity for complex 2.

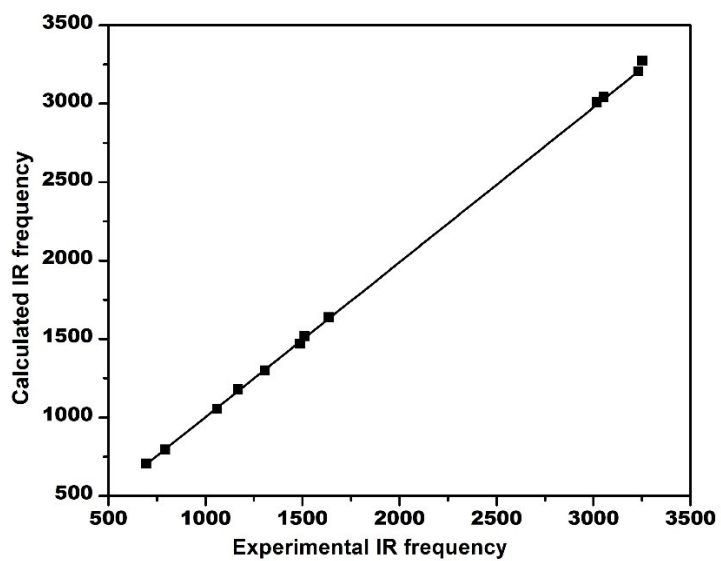

**Fig. S14:** Correlation of calculated and experimental frequencies of complex 2.

**Table 1S.** Hydrogen bond parameters ( $\text{\AA} / ^\circ$ ) for complex **2**.

| D-H     | d(D-H) | d(H..A) | $\angle$ DHA | d(D..A)  | A   | Symmetry code   |
|---------|--------|---------|--------------|----------|-----|-----------------|
| C8-H8   | 0.95   | 2.76    | 159          | 3.666(3) | C11 | 1-x,1/2+y,3/2-z |
| C10-H10 | 0.95   | 2.70    | 157          | 3.594(3) | C11 | 1-x,1/2+y,3/2-z |
| C12-H12 | 0.95   | 2.80    | 166          | 3.727(3) | C11 | 1+x,y,z         |

**Table 2S.** Selected DFT calculated harmonic vibrational frequencies of complex **1** (a scaling factor of 0.96 was used above 2900  $\text{cm}^{-1}$ ) and of **2** and their band assignments.

| Wavenumber<br>( $\text{cm}^{-1}$ )<br>Complex <b>1</b> | Intensity<br>Complex <b>1</b> | Wavenumber<br>( $\text{cm}^{-1}$ )<br>Complex <b>2</b> | Intensity<br>Complex <b>2</b> | Peak assignment                                                       |
|--------------------------------------------------------|-------------------------------|--------------------------------------------------------|-------------------------------|-----------------------------------------------------------------------|
| 706                                                    | 134                           | 694                                                    | 96                            | Benzene ring breathing                                                |
| 790                                                    | 109                           | 791                                                    | 107                           | Op bending of C-H of benzene ring                                     |
| 1060                                                   | 44                            | 1061                                                   | 42                            | C-N stretching                                                        |
| 1166                                                   | 69                            | 1167                                                   | 74                            | H-C=C-H scissoring in benzene ring                                    |
| 1238                                                   | 41                            | 1236                                                   | 43                            | C(benzene)-C stretching                                               |
| 1278                                                   | 176                           | 1284                                                   | 178                           | H-C=C-H scissoring in benzene ring<br>coupled with twisting in H-C-H  |
| 1303                                                   | 275                           | 1306                                                   | 459                           | H-C=C-H ip bending (rocking) in<br>Benzene ring                       |
| 1400                                                   | 42                            | 1401                                                   | 75                            | H-C-H wagging CH2                                                     |
| 1412                                                   | 125                           | 1412                                                   | 105                           | H-C-H wagging CH2                                                     |
| 1491                                                   | 152                           | 1488                                                   | 209                           | H-C=C-H ip bending in benzene ring<br>coupled with H-C-C-C scissoring |
| 1495                                                   | 94                            | 1511                                                   | 61                            | Ip bending of C-H of benzene ring                                     |
| 1572                                                   | 119                           | 1563                                                   | 124                           | C=C stretching in benzene ring                                        |
| 1635                                                   | 67                            | 1636                                                   | 60                            | C=C stretching in benzene ring                                        |
| 1664                                                   | 385                           | 1668                                                   | 458                           | C=N stretching                                                        |
| 3035                                                   | 114                           | 3016                                                   | 114                           | H-C-H symmetric stretching                                            |
| 3077                                                   | 135                           | 3052                                                   | 143                           | C(=N)-H stretching                                                    |
| 3115                                                   | 13                            | 3113                                                   | 71                            | Asymmetric H-C-H stretching                                           |
| 3230                                                   | 11                            | 3230                                                   | 21                            | C-H asymmetric stretching in<br>benzene ring                          |
| 3249                                                   | 26                            | 3251                                                   | 29                            | C-H symmetric stretching in benzene<br>ring                           |

**Table 3S.** The calculated absorption maxima, oscillator strength, and their corresponding band assignment for complex 1.

| Wavelength (nm) | Oscillator strength | Transition occurring from one MO to another MO | Assignment of band                                                                            |
|-----------------|---------------------|------------------------------------------------|-----------------------------------------------------------------------------------------------|
| 388             | 0.0222              | 151 → 156                                      | $n(\text{Cl/O})/d_{xy}(\text{Cu}) \rightarrow \pi^*(\text{benzene})$                          |
| 376             | 0.1504              | 149 → 153                                      | $\pi(\text{benzene})/n(\text{Cl/O}) \rightarrow \pi^*(\text{benzene})$                        |
| 370             | 0.0224              | 150 → 154                                      | $\pi(\text{benzene})/n(\text{Cl/O}) \rightarrow \pi^*(\text{benzene})/d_{x^2-y^2}(\text{Cu})$ |
| 357             | 0.0819              | 134 → 152                                      | $\pi(\text{benzene})/n(\text{Cl/O}) \rightarrow d_{x^2-y^2}(\text{Cu})/\pi^*(\text{C=N})$     |
| 355             | 0.0547              | 148 → 154                                      | $n(\text{Cl}) \rightarrow \pi^*(\text{benzene})/d_{x^2-y^2}(\text{Cu})$                       |
| 346             | 0.0466              | 146 → 153                                      | $n(\text{Cl}) \rightarrow \pi^*(\text{benzene})$                                              |
| 305             | 0.0816              | 148 → 155                                      | $n(\text{Cl/O}) \rightarrow \pi^*(\text{benzene})$                                            |
| 304             | 0.0303              | 144 → 154                                      | $n(\text{Cl/O})/\pi(\text{benzene}) \rightarrow d_{x^2-y^2}(\text{Cu})/\pi^*(\text{benzene})$ |
| 303             | 0.256               | 125 → 152                                      | $n(\text{Cl, N})/\pi(\text{benzene}) \rightarrow d_{x^2-y^2}(\text{Cu})/\pi^*(\text{C=N})$    |

**Table 4S.** The calculated absorption maxima, oscillator strength, and their corresponding band assignment for complex 2.

| Wavelength (nm) | Oscillator strength | Transition occurring from one MO to another MO | Assignment of band                                                                    |
|-----------------|---------------------|------------------------------------------------|---------------------------------------------------------------------------------------|
| 459             | 0.0063              | 142 → 152                                      | $\pi(\text{benzene}) \rightarrow d_{x^2-y^2}(\text{Cu})/n(\text{Cl, N})$              |
| 410             | 0.0132              | 151 → 156                                      | $n(\text{Cl}) \rightarrow \pi^*(\text{benzene})$                                      |
| 380             | 0.1571              | 149 → 153                                      | $\pi(\text{benzene})/n(\text{Br}) \rightarrow \pi^*(\text{benzene})$                  |
| 376             | 0.0305              | 150 → 154                                      | $\pi(\text{benzene})/n(\text{Br/Cl}) \rightarrow \pi^*(\text{benzene})$               |
| 368             | 0.0363              | 135 → 152                                      | $n(\text{Br}) \rightarrow d_{x^2-y^2}(\text{Cu})/n(\text{Cl, N})$                     |
| 322             | 0.1605              | 126 → 152                                      | $\pi(\text{benzene})/n(\text{Cl}) \rightarrow d_{x^2-y^2}(\text{Cu})/n(\text{Cl, N})$ |
| 315             | 0.0367              | 144 → 154                                      | $n(\text{Cl/O}) \rightarrow \pi^*(\text{benzene})$                                    |
| 304             | 0.2805              | 124 → 152                                      | $\pi(\text{benzene}) \rightarrow d_{x^2-y^2}(\text{Cu})/n(\text{Cl, N})$              |
